# 1 Host circadian rhythms are disrupted during malaria infection in parasite genotype- 2 specific manners

3

4 Kimberley F. Prior<sup>1\*</sup>, Aidan J. O'Donnell<sup>1</sup>, Samuel S. C. Rund<sup>2</sup>, Nicholas J. Savill<sup>1</sup>, Daan R. van der Veen<sup>3</sup>,  
5 Sarah E. Reece<sup>1</sup>

6

7 <sup>1</sup> Institute of Evolutionary Biology & Institute of Immunology and Infection Research, University of  
8 Edinburgh, Edinburgh, UK, <sup>2</sup> Department of Biological Sciences, University of Notre Dame, Notre Dame IN,  
9 USA, <sup>3</sup> Faculty of Health and Medical Sciences, University of Surrey, Guildford, UK.

10 \*kimberley.prior@ed.ac.uk

11

## 12 **Abstract**

13 Infection can dramatically alter behavioural and physiological traits as hosts become sick and subsequently  
14 return to health. Such “sickness behaviours” include disrupted circadian rhythms in both locomotor activity  
15 and body temperature. Host sickness behaviours vary in pathogen species-specific manners but the  
16 influence of pathogen intraspecific variation is rarely studied. We examine how infection with the murine  
17 malaria parasite, *Plasmodium chabaudi*, shapes sickness in terms of parasite genotype-specific effects on  
18 host circadian rhythms. We reveal that circadian rhythms in host locomotor activity patterns and body  
19 temperature become differentially disrupted and in parasite genotype-specific manners. Locomotor activity  
20 and body temperature in combination provide more sensitive measures of health than commonly used  
21 virulence metrics for malaria (e.g. anaemia). Moreover, patterns of host disruption cannot be explained  
22 simply by variation in replication rate across parasite genotypes or the severity of anaemia each parasite  
23 genotype causes. It is well known that disruption to circadian rhythms is associated with non-infectious  
24 diseases, including cancer, type 2 diabetes, and obesity. Our results reveal that disruption of host circadian  
25 rhythms is a genetically variable virulence trait of pathogens with implications for host health and disease  
26 tolerance.

27

## 28 **Keywords**

29 Plasmodium, circadian rhythm, circadian clock, sickness behaviour, virulence

30

## 31 **Background**

32 Circadian rhythms include endogenous and entrainable oscillations in physiology and behaviour with a  
33 duration of about 24 hours [1]. Underpinning these rhythms are circadian clocks, which are distributed  
34 across the tree of life [2]. Clocks are assumed to be evolutionarily advantageous because they enable their  
35 owners to anticipate daily environmental rhythms, enabling organisms to prepare and undertake fitness-  
36 determining activities, such as foraging and reproduction, at the most appropriate time of day [3,4].  
37 Additionally, circadian clocks allow for the temporal coordination (or separation) of internal processes [5].  
38 Circadian clocks are reset (entrained) daily by external environmental cues (Zeitgebers), the most  
39 prominent including light and time of feeding. In mammals, environmental time-of-day information is

40 received by the suprachiasmatic nuclei (SCN) of the hypothalamus, known as the central clock, via the  
41 retinohypothalamic tract. This is transmitted to peripheral clocks in the rest of the body, likely via outputs  
42 such as body temperature rhythms and hormone levels. At the same time, non-photic Zeitgebers such as  
43 food intake can uncouple peripheral clocks from the SCN and alter their entrained phase [6]. Disruption of  
44 the coordination between the SCN and peripheral clocks is a consequence of modern lifestyles, particularly  
45 long-term shift work, and associated with a number of non-infectious diseases including cancer, type 2  
46 diabetes, depression and obesity [7,8].

47 Whilst the association between non-infectious diseases and circadian disruption are well-known, the role  
48 that circadian rhythms play in infectious disease has received less attention [9,10]. There are links between  
49 infection, inflammation and the SCN [11,12]. Evidence of this affecting circadian rhythms includes:  
50 arrhythmic activity patterns in fruit flies infected with bacteria [13], a shortening of the duration (period) of  
51 the locomotor activity rhythm in *Trypanosoma*-infected mice [14], and reductions in amplitude of body  
52 temperature and locomotor activity rhythms in SIV-infected monkeys [15]. The extent to which circadian  
53 rhythm disruption is a cost of being infected, or if it is somehow beneficial to hosts or pathogens is unclear.  
54 This is in part due to the complexity caused by interactions between rhythms exhibited by hosts and by  
55 pathogens, whom each have different interests during infection. For example, some pathogens may profit  
56 from disrupting the circadian rhythms of the host, as suggested for influenza virus whereby interference  
57 with clock mechanisms enhances viral replication [16]. Conversely, in cases where the pathogen relies on  
58 the host to supply resources from foraging [17,18], or to provide transmission opportunities from interacting  
59 with conspecifics [19], pathogens may benefit from bolstering host rhythms. Circadian rhythms in host  
60 defences may optimise protection against infection and herbivores, as proposed for *Arabidopsis* plants,  
61 which time their anti-herbivore defences to match the circadian foraging behaviour of caterpillars [20,21].  
62 The extent to which genetic variation amongst pathogens and/or hosts shapes rhythms during infection is  
63 unclear. Understanding this would help determine whether altered rhythms are a host response to  
64 infections (i.e. a manifestation of pathology or an adaptation to control pathogens) and/or are strategically  
65 induced by pathogens (i.e. a parasite manipulation). Here, we investigate whether host circadian rhythms  
66 are disrupted in a pathogen-genotype dependent manner. We follow infections with three genetically  
67 distinct genotypes of the murine malaria parasite, *Plasmodium chabaudi*, and quantify rhythms in a host  
68 behavioural trait (locomotor activity) and a physiological trait (body temperature) (see Fig. 1 for  
69 experimental design). We expect host rhythms to be altered during infection because lethargy, anorexia  
70 and hypothermia are common symptoms of malaria infection [22]. Our parasite genotypes are well  
71 characterised and are known to cause different degrees of virulence, in terms of weight loss, anaemia, and  
72 mortality risk [23,24,25,26]. We couple the relative ease of tracking parasite dynamics and host rhythms  
73 during malaria infection with a new technology to non-invasively monitor locomotor activity and body  
74 temperature rhythms throughout complete infection cycles at high temporal resolutions.

75 Our specific aims are to answer two questions. First, are our measured host circadian rhythms altered in a  
76 parasite-genotype dependent manner throughout the entire infection – from the asymptomatic phase,  
77 through increasing severity of sickness symptoms, and the return to health? Second, is parasite-genotype  
78 dependent disruption to host rhythms associated with their varying levels of virulence and replication rates?  
79 We find that: (i) disruption to locomotor activity and body temperature rhythms occurs during infection in a

80 parasite-genotype dependent manner; (ii) virulent genotypes are associated with more severe effects on  
81 host rhythms; (iii) locomotor activity and body temperature rhythms can change independently; and (iv)  
82 rhythm disruption is only explained in part by variation in the severity of anaemia or parasite density  
83 induced by each genotype. We offer hypotheses for why the genotypes differentially affect host rhythms  
84 and why locomotor activity and body temperature rhythms might change independently.

## 86 **Results**

87 Host rhythms vary during infection in a parasite genotype-specific manner

88 Figure 2a illustrates the four segments of infection based on the relationship between anaemia and parasite  
89 density: “asymptomatic” (days 3-5, in white), “moderate” (days 6-8, in medium grey), “severe” (days 9-11, in  
90 dark grey), and “recovery” (days 12-14, in light grey) (following [27]). Daily rhythms in locomotor activity and  
91 body temperature during each segment of infection for hosts infected with each genotype are shown in Fig.  
92 2b.

### 94 Across-infection patterns in locomotor activity rhythms

95 First, we assess whether there is variation between genotypes in host locomotor activity and body  
96 temperature rhythms across segments of infections, focussing on metrics for time of peak (specifically,  
97 “phase” which is defined as the position of a point in the cycle of a waveform) and amplitude (here  
98 measured as change of a variable between peak and trough) [28]. We find differences in locomotor activity  
99 patterns induced by parasite genotypes across the different segments of infection, as revealed by  
100 significant interactions between sine or cosine terms, parasite genotype and infection segment (Fig. 2, Fig.  
101 3a, sine:  $\chi^2=17.74_{(9,1383)}$ ,  $p<0.0001$ , cosine:  $\chi^2=8.51_{(9,1383)}$ ,  $p<0.0001$ ,  $R^2$  for model fit = 0.51; see  
102 Supplementary Table S2 for effect of genotype). We find that locomotor activity rhythms begin to differ  
103 between mice infected with different parasite genotypes during the “asymptomatic” segment: AJ infected  
104 mice display reduced amplitude rhythms (amplitude using average model fit: AJ = 5.20 bouts/5 mins; AS =  
105 15.23, DK = 23.07) and a slightly delayed time of peak in locomotor activity in the circadian cycle compared  
106 to the other genotypes (the ZT time of peak corresponding to the maximum average model fit: AJ = ZT19.3,  
107 AS = ZT17.02, DK = ZT18.4). During the “moderate” segment, AJ infected mice become arrhythmic in  
108 locomotor activity whereas AS and DK infected hosts maintain rhythms but lose amplitude (AS = 6.89  
109 bouts/5 mins, DK = 4.51) and the timing of peak locomotor activity advances in the circadian cycle (AS =  
110 ZT14.72, DK = ZT17.25). During the “severe” segment, AJ infected mice regain rhythmicity in locomotor  
111 activity, although the amplitude remains low (2.01 bouts/5 mins), while the amplitude in locomotor activity  
112 increases for AS and DK (AS = 10.64, DK = 18.14). Also, the time of peak locomotor activity for AJ and DK  
113 infected mice occurs earlier in the circadian cycle while AS mice returns to the peak time observed in the  
114 “asymptomatic” segment (“severe”: AJ = ZT15.41, AS = ZT18.63, DK = ZT15.64). During the “recovery”  
115 segment, rhythms of mice infected with AS and DK return to the amplitude (AS = 14.59 bouts/5 mins, DK =  
116 19.12) and time of peak of the “asymptomatic” segment (AS = ZT17.71, DK = ZT17.02). AJ infected mice  
117 have rhythms of greater amplitude in locomotor activity during the “recovery” segment (AJ = 15.42)  
118 compared to those observed in the “asymptomatic” segment, becoming similar to AS and DK infected mice.

19 Rhythms in locomotor activity of AJ infected mice also have a similar time of peak locomotor activity to AS  
20 and DK during the “recovery” segment (AJ = ZT17.48) compared to the “asymptomatic” segment.  
21 We then examine how locomotor activity rhythm amplitudes differ in more detail by calculating night-day  
22 differences in levels of locomotor activity. Consistent with the previous analysis, we find significant  
23 differences in the level of locomotor activity induced by infection with different parasite genotypes across  
24 the different segments of infection (interaction between time-of-day, parasite genotype and infection  
25 segment:  $\chi^2=8.99_{(6,115)}$ ,  $p<0.0001$ ,  $R^2$  for model fit = 0.94; Fig. 3b). To explore this further, we separately  
26 analyse night and daytime changes to levels of locomotor activity and observe a significant interaction  
27 between genotype and infection segment for both night-time and daytime (night:  $\chi^2=14.79_{(6,58)}$ ,  $p<0.0001$ ,  
28  $R^2$  for model fit = 0.91; day:  $\chi^2=3.50_{(6,58)}$ ,  $p=0.008$ ,  $R^2$  for model fit = 0.51; see Supplementary Table S3 for  
29 effect of genotype). In addition to the changes observed in the phase and amplitude analysis, we also find  
30 that: (i) Across all segments and parasite genotypes, mice are on average 3.5-fold more active in the night-  
31 time (night-time mean  $10.81\pm0.77$ ) than in the daytime ( $3.13\pm0.19$ ), in line with the nocturnality of these  
32 mice. (ii) Night-time locomotor activity varies more during infection than daytime locomotor activity (range  
33 across all segments, night-time 3-20 locomotor activity bouts/5 mins; daytime 2-5). (iii) Night-time locomotor  
34 activity decreases as infections progress. This decrease is largest for AJ infected mice, intermediate for AS  
35 infections, and least for DK infections. Conversely, night-time activity is regained sooner for DK and AS  
36 infected mice than AJ infected mice (Fig. 3). (iv) Arrhythmicity in AJ infected hosts during the “moderate”  
37 and “severe” segments is driven by a loss of night-time activity (Fig. 3).

38

### 39 Across-infection patterns in body temperature rhythms

40 We repeat the above analyses (for locomotor activity) now for body temperature. We find differences in  
41 body temperature patterns induced by parasite genotypes across the different segments of infection, as  
42 revealed by significant interactions between sine or cosine terms, parasite genotype and infection segment  
43 (Fig. 2, Fig. 3a, sine:  $\chi^2=4.31_{(8,1742)}$ ,  $p<0.0001$ , cosine:  $\chi^2=7.06_{(8,1742)}$ ,  $p<0.0001$ ,  $R^2$  for model fit = 0.53; see  
44 Supplementary Table S2 for effect of genotype). During the “asymptomatic” segment, AJ infected mice  
45 display lower amplitude rhythms in body temperature compared to infection with AS and DK (amplitude  
46 using average model fit: AJ =  $1.12^\circ\text{C}$ , AS =  $1.54^\circ\text{C}$ , DK =  $1.7^\circ\text{C}$ ) and all mice have their peak body  
47 temperature at a similar time (the ZT corresponding to the maximum average model fit: AJ = ZT18.86, AS =  
48 ZT17.94, DK = ZT17.94). During the “moderate” segment, unlike rhythms in locomotor activity, AJ infection  
49 does not generate arrhythmicity in body temperature although all genotypes reduce amplitude (AJ =  
50  $1.07^\circ\text{C}$ , AS =  $1.2^\circ\text{C}$ , DK =  $0.72^\circ\text{C}$ ). Furthermore, time of peak body temperature advances in the circadian  
51 cycle for AJ and AS (AJ = ZT5.98, AS = ZT8.28), but remains similar to the “asymptomatic” segment for DK  
52 (DK = ZT17.25). During the “severe” segment, amplitude in body temperature remains dampened (AJ =  
53  $0.41^\circ\text{C}$ , AS =  $0.95^\circ\text{C}$ , DK =  $0.95^\circ\text{C}$ ) and the time of peak body temperature becomes closer to that in the  
54 “asymptomatic” phase (AJ = ZT15.41, AS = ZT17.71, DK = ZT16.1). In the “recovery” segment, body  
55 temperature rhythms remain slightly dampened for all mice (AJ =  $1.02^\circ\text{C}$ , AS =  $1.42^\circ\text{C}$ , DK =  $1.54^\circ\text{C}$ ) and  
56 peak time returns to match the “asymptomatic” segment (all mice ZT16-18).

57 Next, we examine how body temperature rhythms differ by calculating night-day differences. We find  
58 significant two-way interactions between all explanatory variables (Fig. 3b) – time-of-day: parasite genotype  
59 ( $\chi^2=4.15_{(2,115)}$ ,  $p=0.02$ ), time-of-day: infection segment ( $\chi^2=16.21_{(3,115)}$ ,  $p<0.0001$ ), parasite genotype:  
60 infection segment ( $\chi^2=15.86_{(3,115)}$ ,  $p<0.0001$ ),  $R^2$  for model fit = 0.75; see Supplementary Table S3 for effect  
61 of genotype. As for locomotor activity, we separately analyse night and daytime changes in body  
62 temperature and find a significant interaction between genotype and infection segment for both night-time  
63 ( $\chi^2=6.20_{(6,58)}$ ,  $p=0.0002$ ,  $R^2$  for model fit = 0.78) and daytime ( $\chi^2=11.12_{(6,58)}$ ,  $p<0.0001$ ,  $R^2$  for model fit =  
64 0.62). In addition to the patterns revealed by considering amplitude and time of peak, we find: (i) Across all  
65 segments and parasite genotypes, mice are on average more than 0.5 of a degree Celsius increase in  
66 body temperature in the night-time (night-time mean  $36.44^\circ\text{C}\pm 0.14$ ) than in the daytime ( $35.82^\circ\text{C}\pm 0.10$ ),  
67 following locomotor activity patterns. (ii) Night-time body temperature varies more during infection than  
68 daytime body temperature (range across all segments, night-time  $34.85^\circ\text{C}$ - $37.25^\circ\text{C}$ ; daytime  $34.50^\circ\text{C}$ -  
69  $36.36^\circ\text{C}$ ). Further, in the daytime, body temperature varies more than locomotor activity, especially for AJ  
70 infected mice with genotype differences emerging during the “severe” segment (see significant genotype  
71 comparisons in Supplementary Table S3). (iii) Following the loss of night-time activity as infections  
72 progress, body temperature also decreases (Fig. 3). In addition, AJ infected mice experience a greater  
73 reduction in daytime body temperature than locomotor activity in the “severe” segment, and DK infected  
74 mice experience a reduction in daytime body temperature in the “moderate” segment. (iv) Greater  
75 differences between infection with the different genotypes are revealed by body temperature compared to  
76 locomotor activity in both the “moderate” and “severe” segments (Fig. 3). (v) As for locomotor activity, night-  
77 time body temperature levels recover sooner for DK and AS infected mice by increasing and becoming  
78 similar compared to AJ infected mice (Fig. 3).

79

## 80 Parasite virulence and disruption to host rhythms

81 The previous section reveals that, broadly speaking, host circadian rhythms vary during infections in a  
82 parasite genotype-specific manner. Overall, the patterns we observe suggest that: (i) locomotor activity  
83 rhythms are more sensitive than body temperature rhythms to parasite genotype in the “asymptomatic”  
84 segment. (ii) The most variation between infection with different parasite genotypes is exposed in the  
85 “severe” segment, with rhythms in AJ infected hosts diverging from rhythms in AS and DK infected hosts  
86 (Fig. 3, Supplementary Tables S2 & S3). (iii) The difference in locomotor activity rhythms between infection  
87 with AS and DK disappear after the “asymptomatic” segment, but the effects of AJ on locomotor activity  
88 and body temperature rhythms are not eroded until during the “recovery” segment (Supplementary Table  
89 S3) and even then, AJ mice still have slightly lower amplitude rhythms, particularly in body temperature.  
90 Given that AJ is considered the most virulent of these three genotypes according to measures of anaemia,  
91 weight loss, and replication rate [24,25] we investigated whether levels of disruption to rhythms during  
92 infection correlates with genotype differences in virulence.

93 For each host, we regress hourly levels of locomotor activity and body temperature for every day post  
94 infection (see Supplementary Table S1 “Change in locomotor activity and body temperature,  $R^2$ ”) against  
95 the levels of each before infection. This gives us an  $R^2$  value for each day post infection for every mouse



96 which we use as a metric for rhythm similarity: higher values mean rhythms during infection are more  
97 similar to rhythms of healthy animals. We find significant differences in rhythm dynamics between mice  
98 infected with different parasite genotypes for locomotor activity (Fig. 4a: genotype by day PI interaction  
99  $\chi^2=2.93_{(2,170)}$ ,  $p<0.0001$ ) and body temperature (Fig. 4b: genotype by day PI interaction  $\chi^2=2.19_{(22,170)}$ ,  
00  $p=0.003$ ), see Supplementary Table S4 for effect of genotype. The patterns suggest that across all infected  
01 mice, locomotor activity rhythms experience greater overall disruption than locomotor activity rhythms ( $R^2$   
02 range: locomotor activity 0.08 – 0.41; body temperature 0.16 – 0.72), and locomotor activity rhythms are  
03 disrupted for more days during infection than body temperature (locomotor activity 6-11 PI, body  
04 temperature 7-8 PI). Genotype comparisons reveal, as suggested by the previous analyses, that AJ  
05 associates with the most disruption to locomotor activity and body temperature rhythms, particularly during  
06 the beginning of infections (“asymptomatic” segment), and disruption occurs up until the “recovery”  
07 segment which is longer than the other genotypes (Fig. 3 & 4). AS and DK cause very similar levels of  
08 disruption; changes to locomotor activity rhythms occurs earlier in infections with AS than DK but recovery  
09 occurs at similar rates.

#### 11 Genotype differences in parasite density and anaemia do not correlate with disruption to host rhythms

12 Next, we verify that our genotypes vary in virulence as expected (AJ is the most virulent and DK the least)  
13 according to the traditionally used virulence measures of host anaemia and parasite density [24,25]. We  
14 find significant differences between mice infected with different genotypes in the densities of red blood cells  
15 (Fig. 4c: genotype by day PI interaction  $\chi^2=2.28_{(22,451)}$ ,  $p=0.001$ ,  $R^2$  of model fit = 0.90) and parasites (Fig.  
16 4d: main effect genotype  $\chi^2=14.32_{(2,441)}$ ,  $p<0.0001$ , main effect day PI  $\chi^2=51.90_{(11,441)}$ ,  $p<0.0001$ ,  $R^2$  of  
17 model fit = 0.62) during infections, see Supplementary Table S4 for genotype comparisons. The expected  
18 virulence rank is supported by AS and DK infected mice losing RBC at a slower rate than AJ, and AJ  
19 infected mice showing the slowest recovery from anaemia. Similarly, AJ infected mice harbour the most  
20 parasites throughout infections.

21 Given the genotype differences in host anaemia and parasite replication, and that most disruption to  
22 locomotor activity and body temperature rhythms coincides with minimum RBC density and follows peak  
23 parasite density (Fig. 4; days 6-9 PI, see Supplementary Figure 1 for these data plotted as a disease map),  
24 we investigated how well RBC loss or parasite density *per se* correlates with rhythm disruption compared to  
25 other unknown genotype-specific factors. To do this, we regress the daily measures of rhythm disruptions  
26 for each host, as captured by our rhythm similarity metric (see Supplementary Table S1 “Change in  
27 locomotor activity and body temperature,  $R^2$ ”) for locomotor activity and body temperature against the mean  
28 daily measures for RBC and parasite densities. See Supplementary Table S5 for effects of genotype. For  
29 locomotor activity disruption, we find an interaction between genotype and RBC density (Fig. 5a,  
30  $\chi^2=3.55_{(2,170)}$ ,  $p=0.03$ ,  $R^2$  of model fit = 0.61) as well as an interaction between genotype and parasite  
31 density (Fig. 5b,  $\chi^2=12.00_{(2,170)}$ ,  $p<0.0001$ ,  $R^2$  of model fit = 0.46). These interactions are driven by AJ  
32 causing more disruption to locomotor activity rhythms at the same RBC and parasite density, especially at  
33 low RBC and high parasite densities, and by AS causing more severe disruptions at high parasite densities.  
34 For body temperature disruption, there is no significant interaction between genotype and RBC density  
35 (Fig. 5c,  $\chi^2=2.56_{(2,170)}$ ,  $p=0.08$ ) but there are significant main effects of genotype ( $\chi^2=7.66_{(2,170)}$ ,  $p=0.0007$ )

36 and RBC density ( $\chi^2=149.19_{(1,170)}$ ,  $p<0.0001$ ),  $R^2$  of model fit = 0.53. Body temperature rhythm disruption  
37 increases as hosts become more anaemic and for a given RBC density, disruption is greater during AJ than  
38 AS infection, with DK causing intermediate levels. As for locomotor activity rhythms, we also find that AJ  
39 causes greater body temperature rhythm disruption at lower parasite densities than AS and DK which  
40 cause similar amounts of disruption (interaction between genotype and parasite density,  $\chi^2=9.66_{(2,170)}$ ,  
41  $p=0.0001$ ; Fig. 5d,  $R^2$  of model fit = 0.33). That genotype remains in all of these models (as a main effect or  
42 in an interaction) suggests that in addition to the levels of anaemia they cause and their replication rates,  
43 other factors inherent to the genotypes must influence host rhythms.

#### 44 **Discussion**

45 We reveal that host rhythms in locomotor activity and body temperature become disrupted during  
46 *Plasmodium chabaudi* infections, in a parasite genotype specific manner. The most virulent genotype (AJ)  
47 disrupted host rhythms to the greatest extent and for the longest time period during infections, and  
48 differences between genotypes become more apparent as hosts progress through infections. However, we  
49 unexpectedly find that genotype-specific disruption to rhythms is not associated with genotype differences  
50 in parasite density or the degree of host anaemia, revealing a role for intra-specific pathogen variation in  
51 shaping the host response to infection. We also find that locomotor activity patterns and body temperature  
52 rhythms show changes independently of one another. As expected, we find that infecting mice with  
53 *Plasmodium* parasites reduces locomotor activity (lethargy) and body temperature (hypothermia) [22]. We  
54 find that night-time locomotor activity and body temperature are indeed being reduced due to infection, but  
55 that daytime (when mice are resting) locomotor activity and body temperature are generally not changed as  
56 much (Fig. 2 & 3). For locomotor activity patterns, this is likely due to inactivity, which cannot decrease into  
57 negative activity, and for body temperature - apart for AJ during the “severe” segment - this may be due to  
58 minimum temperature requirements for survival [29,30]. While infection with all parasite genotypes follow  
59 broadly similar dynamics, a more detailed dissection of daily rhythms reveals differences between  
60 genotypes. For example, the largest locomotor activity differences between genotypes occur during the  
61 “asymptomatic” and “severe” segments. DK infected mice are more active during the “asymptomatic”  
62 segment compared to AJ and AS infected mice, with >2-fold higher night time locomotor activity compared  
63 to AJ infected mice, with AS infected mice intermediate. During the “severe” segment DK infected mice  
64 have 4-fold higher night-time locomotor activity compared to AJ infected mice, which remain at low  
65 locomotor activity levels as in the “moderate” segment for all genotypes, while AS infected mice increase  
66 locomotor activity by a similar amount as DK infected mice. For locomotor activity there are few differences  
67 between genotypes during the daytime. For body temperature, most genotype differences occur during the  
68 “moderate” and “severe” segments, again with DK infected mice having greater night-time body  
69 temperature during these segments compared to AJ infected mice, while body temperature is similar in DK  
70 and AS infected mice during the “severe” segment. Daytime body temperature varies between genotypes  
71 during the “severe” segment in which AJ infected mice have lower body temperature compared to AS and  
72 DK infected mice.

73 Generally, we find the biggest differences in host circadian rhythms after infection with different parasite  
74 genotypes emerging in the “moderate” and “severe” segments of infection, which intriguingly coincides with  
75 the development of adaptive immunity [31]. Adaptive immunity is temperature sensitive, with, for example,

76 heat enhancing the rate of lymphocyte trafficking as well as increasing CD8 T cell differentiation towards  
77 cytotoxic function and interferon-gamma production [32]. Thus, differences in the degree of hypothermia  
78 caused by the parasite genotypes may create variation in the efficiency of the adaptive immune response  
79 and subsequently affect recovery rate, potentially contributing to the differences between genotypes  
80 illustrated in Fig. 5. However, experiments that independently perturb parasite density and RBC density (for  
81 example by using phenylhydrazine to create anaemia) independently of infection are needed to resolve  
82 their influences on rhythm disruption by each parasite genotype. Alternatively, in addition to direct parasite-  
83 mediated exploitation of host resources, parasite virulence also includes damage due to infection-induced  
84 immunopathology, caused by excessive levels of proinflammatory cytokines [33,34]. As the most virulent  
85 genotype, AJ may induce more inflammation than the other genotypes and so, hosts take longer to recover  
86 from the collateral damage. To test these ideas, animals could be kept on heat pads to maintain body  
87 temperature rhythms and explore the role of temperature sensitivity in the immune response, locomotor  
88 activity rhythms and other symptoms. Additionally, the role of different or overactive immune responses on  
89 circadian rhythms could be tested by blocking or enhancing innate immune effectors, or giving animals live  
90 attenuated vaccines [35] or low doses of corticosteroids to dampen immunity.

91 We find that disruption to locomotor activity and body temperature rhythms do not mirror each other. For  
92 example, across infection with all genotypes, locomotor activity rhythms become disrupted sooner and for  
93 longer (Fig. 4a and 4b, Supplementary Table S4), and AJ infected mice lose rhythms in locomotor activity  
94 during the “moderate” segment but retain rhythmicity in body temperature (Fig. 3). In addition to disruption  
95 of locomotor activity and body temperature rhythms occurring at different points in the infection, the nature  
96 of changes to their rhythms differs. For example, there is a body temperature rhythm inversion during  
97 infections with AJ and AS genotypes which does not happen to locomotor activity rhythms (Fig. 3a,  
98 Supplementary Table S2). Changes occur in the timing of peak locomotor activity during sickness but not to  
99 the same degree as for body temperature rhythms and there is a reduction in locomotor activity and body  
00 temperature rhythm amplitude which occurs earlier in locomotor activity. Behavioural and body temperature  
01 rhythms are usually in phase with each other (have similar peak times), with the energetic requirements of  
02 physical activity meaning that usually body temperature is also increased. These rhythms are coordinated  
03 with the external environment, and while they share a common pacemaker in the SCN they may be  
04 differentially regulated [36]. Thus, independent disruption of locomotor activity and body temperature  
05 rhythms is unusual and tends to only be seen under an experimentally-induced “forced desynchrony  
06 protocols” whereby sleep-wake and body temperature rhythms oscillate with different periods [37,38]. Core  
07 body temperature oscillates in a circadian manner and is affected by the basal metabolic rate which is  
08 maintained via organism energy expenditure [39]. If sickness suppresses appetite, and therefore reduces  
09 the amount of energy intake, this may cause disruptions to metabolism which has a knock-on effect to body  
10 temperature. Thus despite being active, sickness may erode the correlation between locomotor activity and  
11 body temperature. Furthermore, perhaps body temperature rhythms are inherently more robust due to their  
12 role in synchronising peripheral oscillators in organs and tissues (amongst other methods including  
13 autonomic innervation, glucocorticoids and feeding rhythms) [40] and so, can be maintained during illness  
14 to a greater extent than locomotor activity rhythms. However, if this is the case then it is surprising that  
15 once affected, body temperature rhythms experience greater disruption than locomotor activity rhythms.



16 Whether disruption to rhythms reflects disruption to the circadian oscillator is unclear. This could happen  
17 via compromising the operation of the central clock in the SCN, or via interfering with peripheral clocks  
18 which then feedback to the SCN clock [40]. Perhaps the sensitivity or perception of Zeitgebers is affected  
19 or perhaps mice are constrained by lack of resources (due to anorexia as well as parasite infection) and are  
20 unable to follow the instructions provided by their clocks. During infection, host innate immune cells release  
21 cytokines (primarily IL-1, IL-6 and TNF $\alpha$ ) which act on the hypothalamus in the brain and induces a fever  
22 response [32]. The primary circadian oscillator is also located in the suprachiasmatic nucleus within the  
23 hypothalamus and whilst its time-keeping should be protected from fever (due to temperature  
24 compensation of circadian clocks [41]), it might be sensitive to cytokines [11,12,42]. In support of this  
25 notion, simulating an infection can be enough to change the timing of clocks: a lengthening of circadian  
26 period and reduced amplitude occurs in cellular rhythms in distal uninfected tissues when *Arabidopsis* is  
27 single-leaf infected with the bacteria *Pseudomonas syringae* or when treated with the plant defence  
28 phytohormone salicylic acid [43]. Furthermore, trypanosome infection in mice shortens the period of  
29 circadian clock gene expression in the liver, hypothalamus and adipose tissue [14].

30 Infection causes pathologies which have negative consequences for host fitness, but there is increasing  
31 recognition that some signs of infection are better defined as “sickness behaviours” that promote host  
32 survival rather than manifestations of pathology [44]. Generally, sickness behaviours could help individuals  
33 cope with the burden of infection by concentrating limited resources on immune functions or by somehow  
34 restricting pathogen growth/reproduction. Both hyper- and hypo-thermia are common responses to infection  
35 and promote survival [32]. For example, despite a 1°C increase in core body temperature requiring a 10-  
36 12% increase in metabolic rate [45], inhibiting fever in these cases increases mortality [46]. Whereas in  
37 instances of severe inflammation, lowering temperature promotes survival [47,48]. With acute malaria  
38 infection inducing inflammation [49], hypothermia could be best achieved by reducing the amplitude of body  
39 temperature rhythms, and energy expenditure could be limited by reducing locomotor activity amplitude.  
40 Furthermore, hosts may need to disrupt their core rhythms to override the circadian rhythms of innate  
41 immune cells [50], ensuring they can mount an acute response at any time of day. In addition, by disrupting  
42 their own rhythms, hosts might limit resources or time-cues required by parasites [17], making parasites  
43 more susceptible to clearance by the host [51]. That there is genetic variation amongst parasites in  
44 circadian rhythm disruption of the host that correlates with other genetically encoded virulence traits,  
45 suggests it is a cost of virulence. If host rhythm disruption is bad for parasites then parasites are likely to be  
46 under selection to reinforce host rhythms in physiology and behaviour. Alternatively, disrupting host  
47 rhythms may be beneficial to parasites [24,25]: more virulent genotypes tend to be better competitors and  
48 inducing greater levels of host disruption may disadvantage other coinfecting genotypes.

49 In summary, we reveal that malaria infection disrupts host circadian rhythms in behaviour and physiology in  
50 parasite genotype dependent manners. It has been proposed that, unlike trypanosome infection, malaria  
51 parasites do not affect the circadian rhythms of their hosts [14]. However, this study summarised rhythms  
52 over the infection as a whole, but our data reveal short-term rhythm disruption that could easily be missed  
53 when summarising an entire infection. While Rijo-Ferreira et al [14] suggest clock gene expression is  
54 disrupted in adipose tissue during malaria infection, we have not investigated whether malaria parasites  
55 disrupt host rhythms by affecting the working of host circadian clocks, but our data suggest that such

56 studies should focus on the symptomatic phases of infections with virulent genotypes. We propose that  
57 circadian rhythm disruption is a more appropriate metric of health than anaemia as it gives an overall  
58 systemic view of host physiology and behaviour during sickness, especially during the early phases of  
59 infection, and is sensitive to parasite genotype. Whilst we only consider three parasite genotypes, our  
60 results suggest host rhythm disruption is a genetically variable parasite trait and cannot be explained by  
61 traditional measures of virulence (anaemia and parasite replication rates, Fig. 5). If so, then it may be under  
62 selection but it is not clear whether parasites benefit from disrupting or protecting host rhythms. Whether  
63 perturbations of immune responses, drug treatment, or genetic diversity of infections increases the  
64 exposure of parasite genetic variation to selection is tractable and relevant given the reduction in malaria  
65 prevalence and the association between parasite rhythms and tolerance to antimalarial drugs. Our results  
66 highlight the potential for circadian rhythms as an arena for host-parasite coevolution. Analysing the costs  
67 and benefits of disrupted host rhythms for both hosts and parasites will help reveal to what extent  
68 manipulation of their own and each other's rhythms is involved in parasite offence and host defence.

## 69 70 **Methods**

### 71 Infections and experimental design

72 We used 8-week-old male MF1 mice (bred in-house, University of Edinburgh) with *ad libitum* access to food  
73 and drinking water (supplemented with 0.05% para-amino benzoic acid to facilitate parasite growth). We  
74 entrained sixty experimental mice to a 12:12h (lights on 7am/ZT0, lights off 7pm/ZT12; ZT is Zeitgeber  
75 Time which is the number of hours after lights on) light:dark cycle for 2 weeks prior to, and during, the  
76 experiment. Mice were randomly allocated to 3 treatment groups of 20 mice each (see Fig. 1 for  
77 experimental design). We intravenously infected all mice with  $10^7$  *Plasmodium chabaudi* parasitized red  
78 blood cells (RBC) at ring stage. Parasitised RBCs were harvested from donor mice that were on the same  
79 light:dark cycle as the experimental mice. Mice in each treatment group received either genotype AJ, AS, or  
80 DK (AJ is a more virulent parasite with infections generating greater amounts of anaemia and reaching  
81 higher parasite densities, while DK is a less virulent parasite and AS intermediate). We designated 5 mice  
82 in each group to the monitoring of rhythms ("rhythm mice") and they received subcutaneous RFID tags  
83 [BioTherm13 RFID (radio-frequency identification) (Biomark, Idaho, USA)] 7 days before infection to  
84 continuously record locomotor activity and body temperature rhythms in conjunction with a Home Cage  
85 Analysis system (Actual HCA, Actual Analytics Ltd, Edinburgh, Scotland; see Supplementary Methods).  
86 The "rhythm mice" remained unsampled throughout the experiment. We designated the remaining 15 mice  
87 per group to the monitoring of infection dynamics ("sampling mice"). The "sampling mice" were blood  
88 sampled daily (see Supplementary Methods) to quantify parasite dynamics and blood parameters. By  
89 separately housing the RFID tagged "rhythm mice" and the blood sampled "sampling mice", we minimised  
90 the effects of disturbance on data collected to examine locomotor activity and body temperature rhythms of  
91 the RFID tagged mice. The 15 "sampling mice" were infected in two separate blocks of 10 mice and 5 mice  
92 with identical set up to augment sample size in the event of mortality induced by the more virulent  
93 genotypes. Data from "rhythm mice" and "sampling mice" were collected between days 3 and 14 post  
94 infection (PI). See Supplementary Methods for more information on sampling and data collection.

## 96 Data analyses

97 We used R v. 3.5.0 (R Core Team 2013) to fit linear models (lmer in the R package “lme4”) and derived  
98 minimum adequate models through stepwise model simplification based on Pearson’s chi-square test  
99 (using the drop1 function in the R package “stats”). The residual distribution of the model fits were checked  
00 visually for normality. We report  $R^2$  values for each model as a measure of how close the data fit to the  
01 regression line (i.e. the variance accounted for by the model). We used mixed-effects models due to  
02 repeated measures taken from the same mice. The first section describes how we test for genotype-  
03 specific disruption to host rhythms. The second section explains how we verify the genotypes vary in  
04 virulence as expected. The final section explains how we determine if variation in disruption to host rhythms  
05 is associated with known differences in virulence and replication rate across the parasite genotypes.

06

### 07 Genotype-specific effects on host rhythms during infection

08 Following Torres et al [27] we first split the infection into four equal length segments (“asymptomatic”,  
09 “moderate”, “severe”, “recovery”) based on red blood cell and parasite dynamics (see Fig. 2 and  
10 Supplementary Table S1 “segment summary”). These segments also reflect the general signs of infection  
11 observed during sampling (e.g. lethargy, piloerection). This generates a “disease map” which we use to  
12 generalise patterns of host rhythm disruption during different areas of infection in terms of temporal  
13 variation in disease parameters. We then ask whether patterns for host locomotor activity and body  
14 temperature differ between parasite genotypes, both within and between infection segments. We fit models  
15 using either host locomotor activity or body temperature as the response variable. For explanatory  
16 variables, we fit parasite genotype, segment of infection, and sine and cosine terms as fixed effects with  
17 interactions, with mouse identity as a random effect. We say locomotor activity or body temperature has  
18 become arrhythmic (i.e. no detectable rhythm) when both the sine and cosine terms can be removed from  
19 the model. We calculate time of peak and amplitude for each rhythm in each rhythmic segment and  
20 compare them between parasite genotypes (see Supplementary Table S1 “time of peak” and “amplitude”,  
21 [28]). Exploring the differences between genotypes is not computationally possible using this modelling  
22 approach because the wave form parameters (sine and cosine terms) are not compatible with good  
23 practice for multiple testing of general linear models. Therefore, we only report the  $R^2$  and AIC values for  
24 the effect of genotype (Supplementary Table S2).

25 Next, we investigate diel variation in host rhythms in more detail by calculating summary variables of  
26 locomotor activity and body temperature for night and day (see Supplementary Table S1 “amount of  
27 locomotor activity and mean body temperature”). We calculate the mean locomotor activity and body  
28 temperature values during each 3-day segment of infection for 8 hours during the night (ZT14-ZT22) and  
29 day (ZT2-ZT10) for each mouse. The central 8 hours are used to avoid fluctuations during the light  
30 transitions. We again compare the effect of different parasite genotypes on locomotor activity and body  
31 temperature within and between the four infection segments. Our models use the summary variables for  
32 either host locomotor activity or body temperature as the response variable and, as explanatory variables,  
33 parasite genotype, segment of infection and time-of-day (night, day) with interactions, and host identity as a  
34 random effect. We use the glht function in the “multcomp” R package to perform pair-wise comparisons

35 between genotypes with Tukey HSD (correcting p values for multiple comparisons) (Supplementary Table  
36 S3).

### 38 Parasite virulence shapes host rhythm disruption

39 To examine whether the parasite genotypes vary in the patterns of host rhythm disruption during infections,  
40 we model either the change in host locomotor activity or body temperature (see Supplementary Table S1;  
41 “change in locomotor activity and body temperature,  $R^2$ ”) as response variables and day post infection and  
42 parasite genotype as explanatory variables, including interactions, and mouse identity as a random effect.  
43 Then, to examine whether the parasite genotypes vary in replication rate and in the anaemia they cause,  
44 we model either RBC or parasite density as response variables with day post infection and parasite  
45 genotype as explanatory variables, including interactions, and mouse identity as a random effect.

### 47 Replication rate and anaemia explaining disruption to host rhythms

48 Given that the genotypes differ across infections in host locomotor activity and body temperature rhythm  
49 disruption and reach different parasite densities and cause different levels of anaemia, we ask whether  
50 rhythm disruption is associated with the densities of RBCs or parasites. We fit models using change in host  
51 locomotor activity or body temperature (see Supplementary Table S1 “change in locomotor activity and  
52 body temperature,  $R^2$ ”) as response variables and parasite genotype, log base10 RBC or parasite density  
53 as explanatory variables with interactions, and mouse identity as a random effect. Note, because our  
54 design used different mice to monitor rhythms and infection dynamics, the models included the average  
55 RBC or parasite density per day as determined by the “sampling mice” ( $N \leq 15$  per genotype), and locomotor  
56 activity and body temperature measures per day from each of the “rhythm mice” ( $N \leq 5$  per genotype). Again,  
57 post-hoc comparisons between genotypes were made with Tukey HSD (Supplementary Table S5).

### 59 Ethics

60 All procedures were carried out in accordance with the UK Home Office regulations (Animals Scientific  
61 Procedures Act 1986; project licence number 70/8546) and approved by the University of Edinburgh.

### 63 **References**

- 64 1. Dunlap, J.C. Genetic and Molecular Analysis of Circadian Rhythms. *Annu. Rev. Genet.* **1**, 579–601  
65 (1996).
- 66 2. Young M.W. & Kay S.A. Time zones: a comparative genetics of circadian clocks. *Nat. Rev. Genet.*  
67 **9**, 702–15 (2001).
- 68 3. Paranjpe, D.A. & Sharma, V.K. Evolution of temporal order in living organisms. *J. Circadian*  
69 *Rhythms.* **3**, 7; 10.1186/1740-3391-3-7 (2005).
- 70 4. van der Veen, D.R. *et al.* Flexible clock systems: adjusting the temporal programme. *Philos. Trans.*  
71 *R. Soc. Lond. B. Biol. Sci.* **372**, 20160254; 10.1098/rstb.2016.0254 (2017).
- 72 5. Vaze, K.M. & Sharma, V.K. On the adaptive significance of circadian clocks for their owners.  
73 *Chronobiol. Int.* **30**, 413–33 (2013).

- 74 6. Stokkan, K.A. Entrainment of the circadian clock in the liver by feeding. *Science*. **291**, 490–493  
75 (2001).
- 76 7. Bass, J. & Lazar, M.A. Circadian time signatures of fitness and disease. *Science*. **354**, 994–999  
77 (2016).
- 78 8. McHill, A.W. & Wright, K.P. Jr. Role of sleep and circadian disruption on energy expenditure and in  
79 metabolic predisposition to human obesity and metabolic disease. *Obes. Rev.* **18**, 15–24 (2017).
- 80 9. Martinez-Bakker, M. & Helm, B. The influence of biological rhythms on host–parasite interactions.  
81 *Trends Ecol. Evol.* **30**, 314–326 (2015).
- 82 10. Reece, S.E., Prior, K.F. & Mideo, N. The life and times of parasites: Rhythms in strategies for within-  
83 host survival and between-host transmission. *J. Biol. Rhythms*. **32**, 516–533 (2017).
- 84 11. Okada, K. *et al.* Injection of LPS causes transient suppression of biological clock genes in rats. *J.*  
85 *Surg. Res.* **145**, 5–12 (2008).
- 86 12. Cavadini, G. *et al.* TNF- $\alpha$  suppresses the expression of clock genes by interfering with E-box-  
87 mediated transcription. *Proc. Natl. Acad. Sci. U.S.A.* **104**, 12843–12848 (2007).
- 88 13. Shirasu-Hiza, M.M., Dionne, M.S., Pham, L.N., Ayres, J.S. & Schneider, D.S. Interactions between  
89 circadian rhythm and immunity in *Drosophila melanogaster*. *Curr. Biol.* **17**, 353–355 (2007).
- 90 14. Rijo-Ferreira, F. *et al.* Sleeping sickness is a circadian disorder. *Nat. Commun.* **9**, 1;  
91 10.1038/s41467-017-02484-2 (2018).
- 92 15. Huitron-Resendiz, S., Marcondes, M.C.G., Flynn, C.T., Lanigan, C.M.S. & Fox, H.S. Effects of  
93 simian immunodeficiency virus on the circadian rhythms of body temperature and gross locomotor  
94 activity. *Proc. Natl. Acad. Sci. U.S.A.* **104**, 15138–15143 (2007).
- 95 16. Edgar, R.S. *et al.* Cell autonomous regulation of herpes and influenza virus infection by the  
96 circadian clock. *Proc. Natl. Acad. Sci. U.S.A.* **113**, 10085–10090. (2016).
- 97 17. Prior, K.F. *et al.* Timing of host feeding drives rhythms in parasite replication. *PLoS Pathog.* **14**,  
98 e1006900; 10.1371/journal.ppat.1006900 (2018).
- 99 18. Hirako, I.C. *et al.* Daily Rhythms of TNF- $\alpha$  Expression and Food Intake Regulate Synchrony of  
00 Plasmodium Stages with the Host Circadian Cycle. *Cell Host Microbe*. **23**, 796–808 (2018).
- 01 19. Smith, M.J. *et al.* Host-pathogen time series data in wildlife support a transmission function between  
02 density and frequency dependence. *Proc. Natl. Acad. Sci. U.S.A.* **106**, 7905–7909 (2009).
- 03 20. Goodspeed, D., Chehab, E.W., Min-Venditti, A., Braam, J. & Covington, M.F. Arabidopsis  
04 synchronizes jasmonate-mediated defense with insect circadian behavior. *Proc. Natl. Acad. Sci.*  
05 *U.S.A.* **109**, 4674–4677 (2012).
- 06 21. Goodspeed, D., Chehab, E.W., Covington, M.F. & Braam, J. Circadian control of jasmonates and  
07 salicylates. *Plant Signal. Behav.* **8**, e23123; 10.4161/psb.23123 (2013).
- 08 22. Cumnock, K. *et al.* Host Energy Source Is Important for Disease Tolerance to Malaria. *Curr. Biol.*  
09 **28**, 1635–1642 (2018).
- 10 23. Ramiro, R.S., Reece, S.E. & Obbard, D.J. Molecular evolution and phylogenetics of rodent malaria  
11 parasites. *BMC Evol. Biol.* **12**, 219; 10.1186/1471-2148-12-219 (2012).
- 12 24. Mackinnon, M.J. & Read, A.F. Virulence in malaria: an evolutionary viewpoint. *Philos. Trans. R.*  
13 *Soc. Lond. B. Biol. Sci.* **359**, 965–986 (2004).



- 14 25. Fairlie-Clarke, K.J., Allen, J.E., Read, A.F. & Graham, A.L. Quantifying variation in the potential for  
15 antibody-mediated apparent competition among nine genotypes of the rodent malaria parasite  
16 *Plasmodium chabaudi*. *Infect. Genet. Evol.* **20**, 270–275 (2013).
- 17 26. Cameron, A., Reece, S.E., Drew, D.R., Haydon, D.T. & Yates, A.J. Plasticity in transmission  
18 strategies of the malaria parasite, *Plasmodium chabaudi*: environmental and genetic effects. *Evol.*  
19 *Appl.* **6**, 365–376 (2012).
- 20 27. Torres, B.Y. *et al.* Tracking Resilience to Infections by Mapping Disease Space. *PLOS Biol.* **14**,  
21 e1002436; 10.1371/journal.pbio.1002436 (2016).
- 22 28. Hannon, E.R., Calhoun, D.M., Chadalawada, S. & Johnson, P.T.J. Circadian rhythms of trematode  
23 parasites: applying mixed models to test underlying patterns. *Parasitology.* **145**, 783–791 (2017).
- 24 29. Geiser, F. Metabolic Rate and Body Temperature Reduction During Hibernation and Daily Torpor.  
25 *Annu. Rev. Physiol.* **66**, 239–274 (2004).
- 26 30. Erecinska, M., Thoresen, M. & Silver, I.A. Effects of Hypothermia on Energy Metabolism in  
27 Mammalian Central Nervous System. *J. Cereb. Blood Flow Metab.* **23**, 513–530 (2003).
- 28 31. Chaplin, D.D. Overview of the immune response. *J. Allergy Clin. Immunol.* **125**, S3–23;  
29 10.1016/j.jaci.2009.12.980 (2010).
- 30 32. Evans, S.S., Repasky, E.A., Fisher, D.T. Fever and the thermal regulation of immunity: the immune  
31 system feels the heat. *Nat. Rev. Immunol.* **15**, 335–349 (2015).
- 32 33. Voller, A. Immunopathology of malaria. *Bull. World Health Organ.* **50**, 177-186 (1974).
- 33 34. Long, G.H. & Graham, A.L. Consequences of immunopathology for pathogen virulence evolution  
34 and public health: malaria as a case study. *Evol. Appl.* **4**, 278–91 (2011).
- 35 35. Pulendran, B. & Ahmed, R. Immunological mechanisms of vaccination. *Nat. Immunol.* **12**, 509-517  
36 (2011).
- 37 36. Cambras, T. *et al.* Circadian desynchronization of core body temperature and sleep stages in the  
38 rat. *Proc. Natl. Acad. Sci. U.S.A.* **104**, 7634–7639 (2007).
- 39 37. Dijk, D. & Czeisler, C. Contribution of the circadian pacemaker and the sleep homeostat to sleep  
40 propensity, sleep structure, electroencephalographic slow waves, and sleep spindle activity in  
41 humans. *J. Neurosci.* **15**, 3526–38 (1995).
- 42 38. Strijkstra, A.M., Meerlo, P. & Beersma, D.G.M. Forced Desynchrony of Circadian Rhythms of Body  
43 Temperature and Activity in Rats. *Chronobiol. Int.* **16**, 431–440 (1999).
- 44 39. Eckel-Mahan, K. & Sassone-Corsi, P. Metabolism and the Circadian Clock Converge. *Physiol. Rev.*  
45 **93**, 107–135 (2013).
- 46 40. Mohawk, J.A., Green, C.B. & Takahashi, J.S. Central and Peripheral Circadian Clocks in Mammals.  
47 *Annu. Rev. Neurosci.* **35**, 445–462 (2012).
- 48 41. Barrett, R. & Takahashi, J. Temperature compensation and temperature entrainment of the chick  
49 pineal cell circadian clock. *J. Neurosci.* **15**, 5681–5692 (1995).
- 50 42. Duhart, J.M. *et al.* Suprachiasmatic Astrocytes Modulate the Circadian Clock in Response to TNF- $\alpha$ .  
51 *J. Immunol.* **191**, 4656–4664 (2013).
- 52 43. Li, Z., Bonaldi, K., Uribe, F. & Pruneda-Paz, J.L. A Localized *Pseudomonas syringae* Infection  
53 Triggers Systemic Clock Responses in Arabidopsis. *Curr. Biol.* **28**, 630–639 (2018).

- 54 44. Hart, B.L. Biological basis of the behaviour of sick animals. *Neurosci. Biobehav. Rev.* 1988  
55 Feb;12(2):123-137.
- 56 45. Kluger, M.J. Phylogeny of fever. *Fed. Proc.* **38**, 30-34 (1979).
- 57 46. Earn, D.J.D., Andrews, P.W. & Bolker, B.M. Population-level effects of suppressing fever. *Proc. Biol.*  
58 *Sci.* **281**, 20132570; 10.1098/rspb.2013.2570 (2014).
- 59 47. Romanovsky, A.A. & Székely, M. Fever and hypothermia: two adaptive thermoregulatory responses  
60 to systemic inflammation. *Med. Hypotheses.* **50**, 219–226 (1998).
- 61 48. Liu, E. *et al.* Naturally occurring hypothermia is more advantageous than fever in severe forms of  
62 lipopolysaccharide- and *Escherichia coli*-induced systemic inflammation. *Am. J. Physiol. Regul.*  
63 *Integr. Comp. Physiol.* **302**, R1372–83; 10.1152/ajpregu.00023.2012 (2012).
- 64 49. Khoury, D.S. *et al.* Host-mediated impairment of parasite maturation during blood-stage  
65 *Plasmodium* infection. *Proc. Natl. Acad. Sci. U.S.A.* **114**, 7701–7706 (2017).
- 66 50. Scheiermann, C., Kunisaki, Y. & Frenette, P.S. Circadian control of the immune system. *Nat. Rev.*  
67 *Immunol.* **13**, 190–198 (2013).
- 68 51. O'Donnell, A.J., Schneider, P., McWatters, H.G. & Reece, S.E. Fitness costs of disrupting circadian  
69 rhythms in malaria parasites. *Proc. Biol. Sci.* **278**, 2429–2436 (2011).
- 70

71 **Figures**

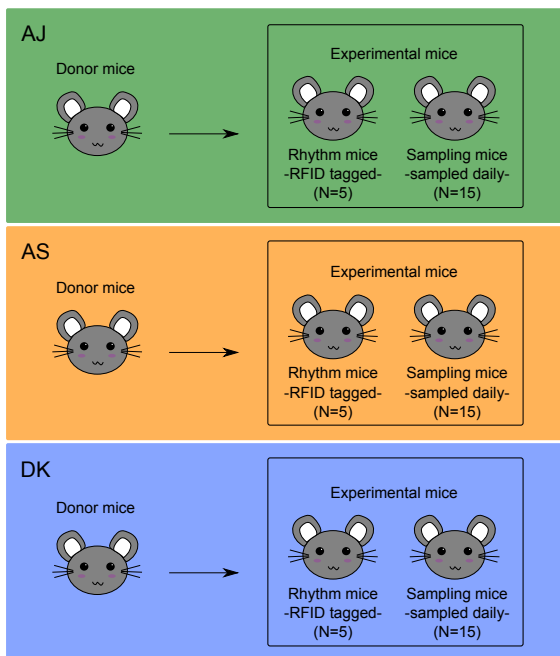

72

73 Fig. 1. Experimental design. We separately raised three genotypes (AJ, AS, DK) of *Plasmodium chabaudi*  
74 in donor mice before inoculating them into 3 groups of 20 experimental mice. We tagged 5 experimental  
75 mice per genotype with RFID probes to monitor locomotor activity and body temperature non-invasively  
76 (“rhythm mice”) and we blood sampled 15 experimental mice per genotype to monitor parasite and host  
77 dynamics once per day (“sampling mice”). We followed host rhythms and infection dynamics throughout 14  
78 days of infection.

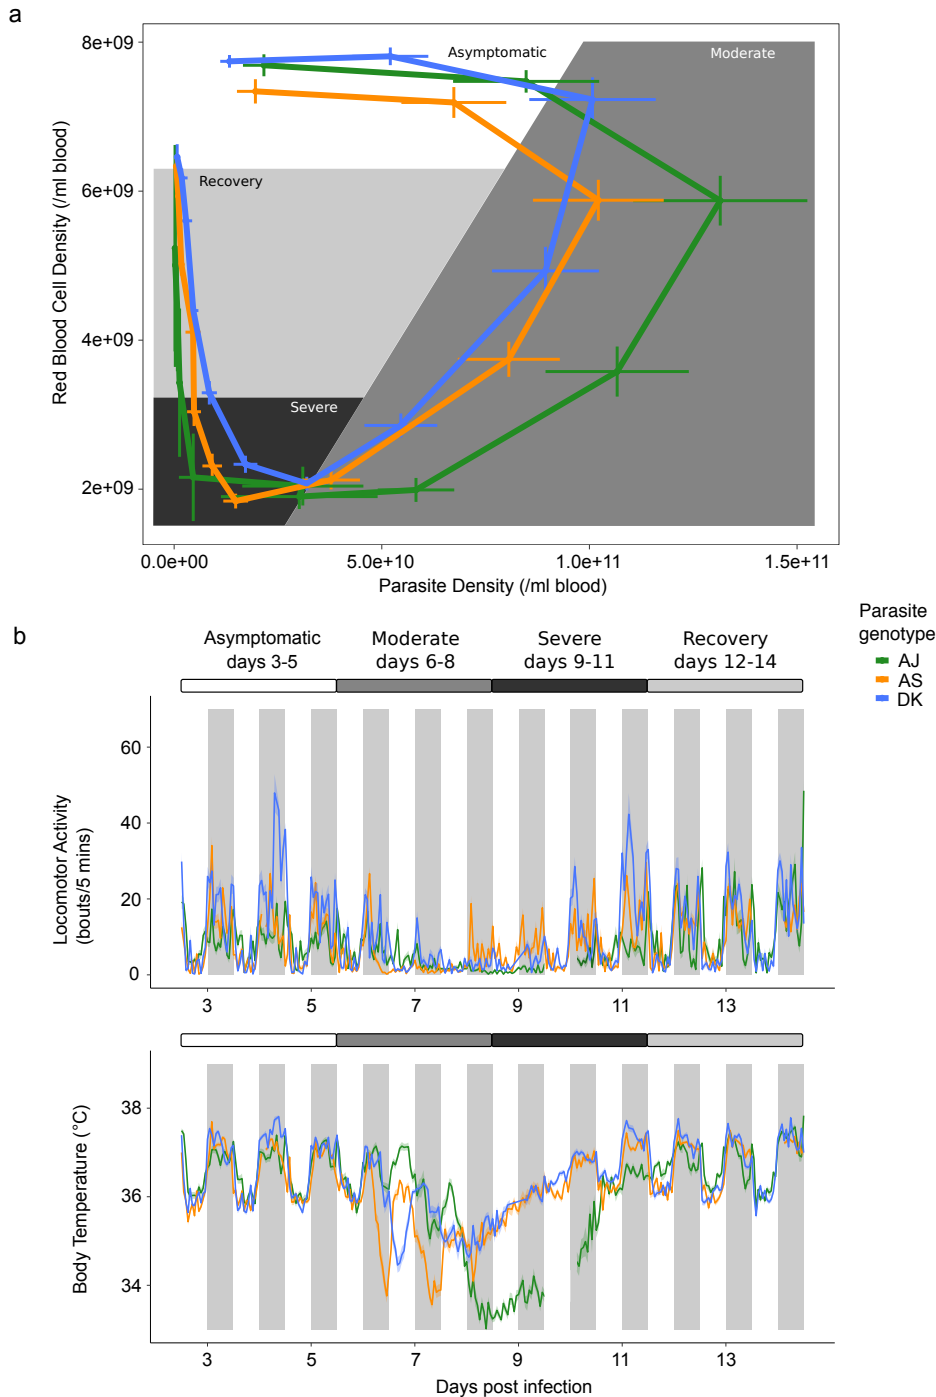

79

80 Fig. 2. Parasite genotype-specific effects on host sickness, locomotor activity and body temperature  
 81 rhythms during malaria infection. a) Disease map of host sickness using the relationship between mean  $\pm$   
 82 SEM red blood cell (RBC) and mean  $\pm$  SEM parasite density (adapted from [27]) for three parasite  
 83 genotypes ( $N \leq 15$  per genotype: green=AJ, orange=AS, blue=DK) measured each day post infection (PI) for  
 84 14 days. The map falls into 4 three-day segments. (i) Hosts are considered “asymptomatic” (white, days 3-5  
 85 PI) until RBC density begins to drop; (ii) Hosts experience “moderate” symptoms (medium grey, days 6-8  
 86 PI) until RBC density reaches its minimum; (iii) “severe” symptoms (dark grey, days 9-11 PI) spans the  
 87 period of extremely low RBC densities; and (iv) hosts are in “recovery” (light grey, days 12-14 PI) until RBC  
 88 density returns to the level before infection. b) Mean  $\pm$  SEM hourly locomotor activity and body temperature  
 89 (see Supplementary Table S1 for further explanation) for 14 days of infection with the same three parasite

90 genotypes (N=5 per genotype: green=AJ, orange=AS, blue=DK). Note in B the line break on day 9-10 PI  
 91 for the AJ genotype which represents missing data.

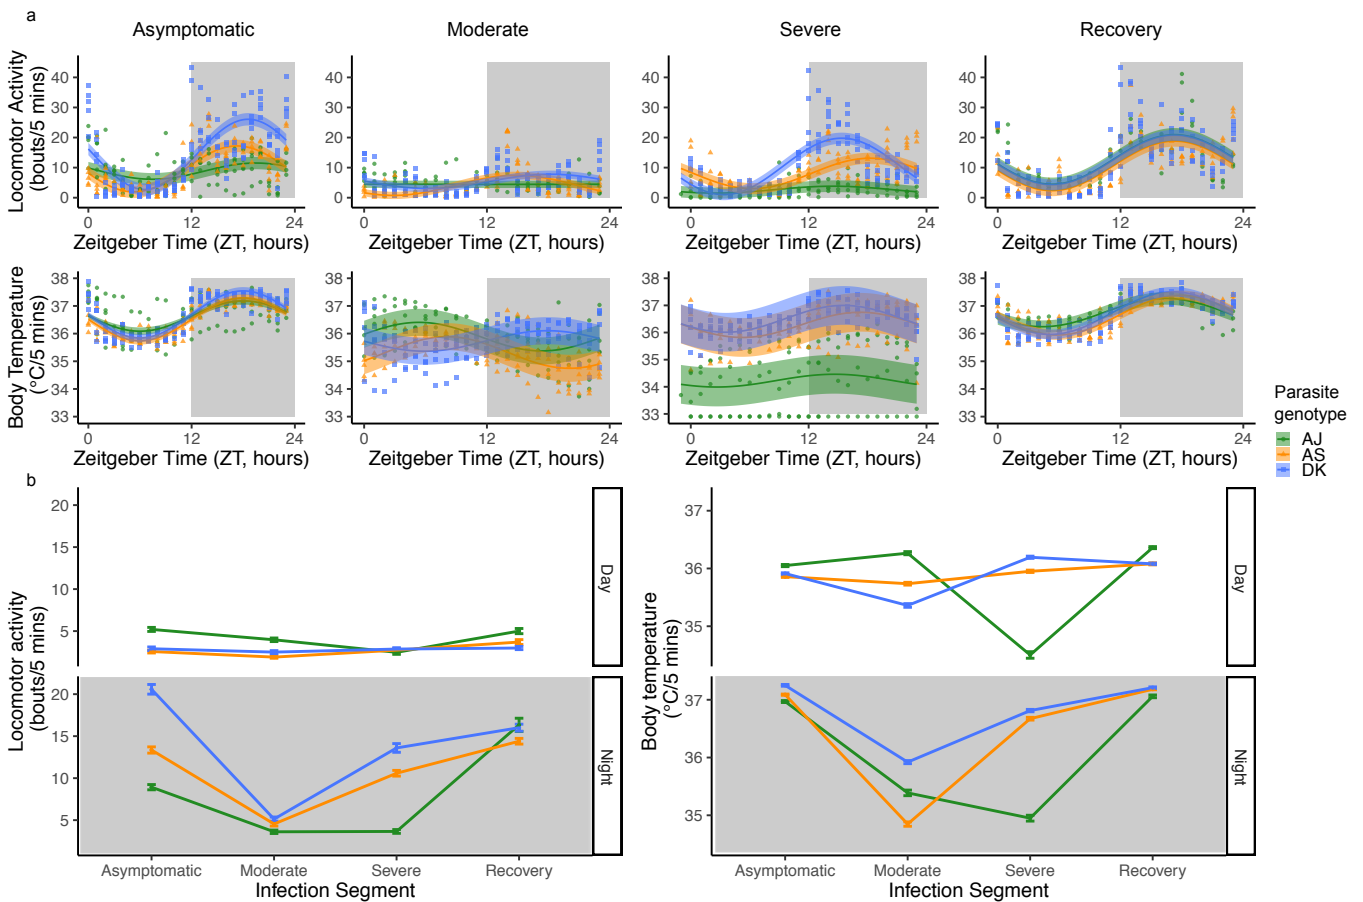

92

93 Fig 3. Locomotor activity and body temperature profiles for each 3-day infection segment. a) All data with  
 94 model predictions (fitted model for the average subject, with 95% confidence intervals calculated by  
 95 bootstrapping N=500). Each data point behind the model prediction is a 3-day locomotor activity or body  
 96 temperature average for each mouse (N≤15 per genotype: green circles=AJ, orange triangles=AS, blue  
 97 squares=DK) at every hour (24-hours in total) and the model is fit to these averaged data points. Time is in  
 98 Zeitgeber Time (ZT) which is the number of hours since lights on (ZT0) and ZT12 is the start of lights off (as  
 99 indicated by shaded area). b) Mean ±SEM levels of locomotor activity or body temperature during night time  
 00 or daytime for the infection segments (N≤5 per genotype: green=AJ, orange=AS, blue=DK). For night-day  
 01 comparisons we use the average amount of locomotor activity and body temperature for each segment of  
 02 infection, using ZT14-22 as night time and ZT2-10 as daytime to avoid any effects of dark-light transitions.  
 03 Night time is indicated by the shaded area. Light and dark bars indicate lights on (7am/ZT0) and lights off  
 04 (7pm/ZT12).

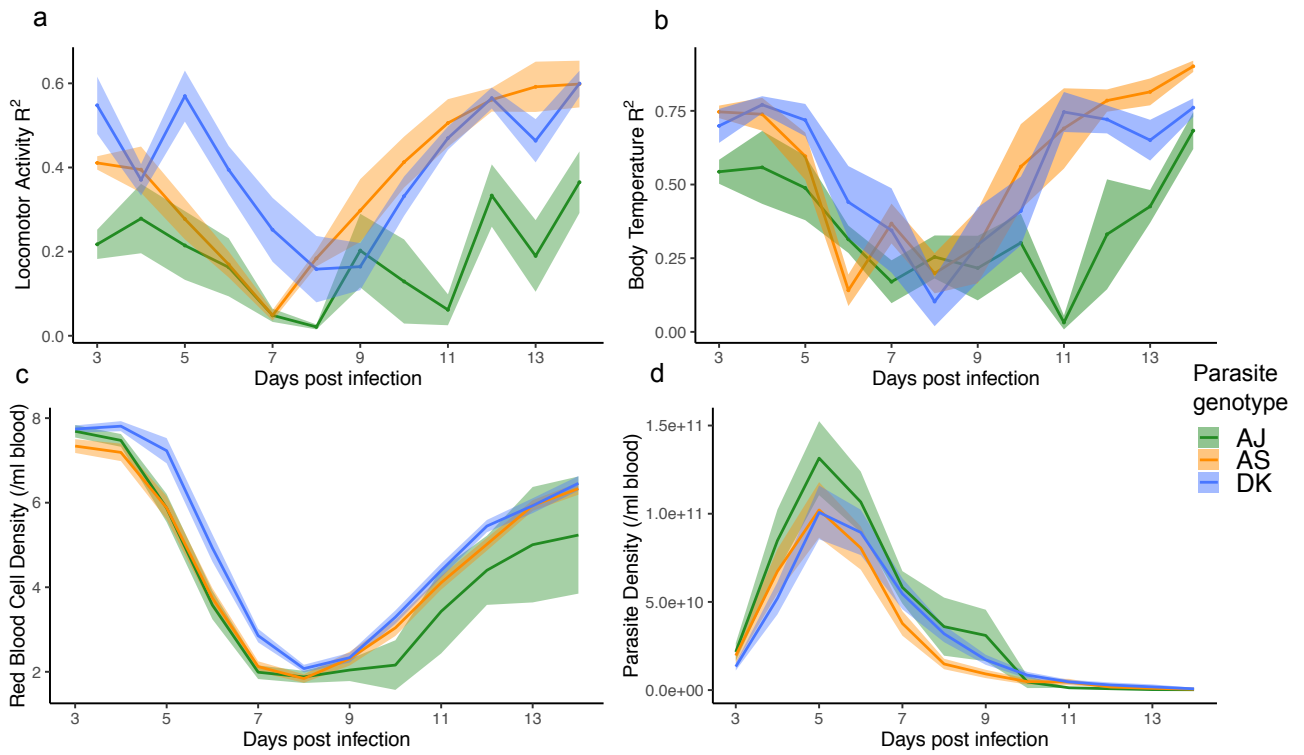

05

06 Fig. 4. Daily dynamics for disruption to locomotor activity and body temperature rhythms and metrics for  
07 parasite virulence. a) Similarity between locomotor activity rhythms on each day post infection compared to  
08 before infection (higher R<sup>2</sup> = rhythms more similar to before infection). b) Similarity between body  
09 temperature rhythms on each day post infection compared to before infection. c) Host red blood cell density  
10 (anaemia) during infections. d) Asexual parasite density during infections. Mean ± SEM plotted (N≤15 per  
11 genotype: green=AJ, orange=AS, blue=DK). Mice were sampled once per day between days 3-14 post  
12 infection in c and d. N≤5 per genotype for a and b, and N≤15 for c and d.



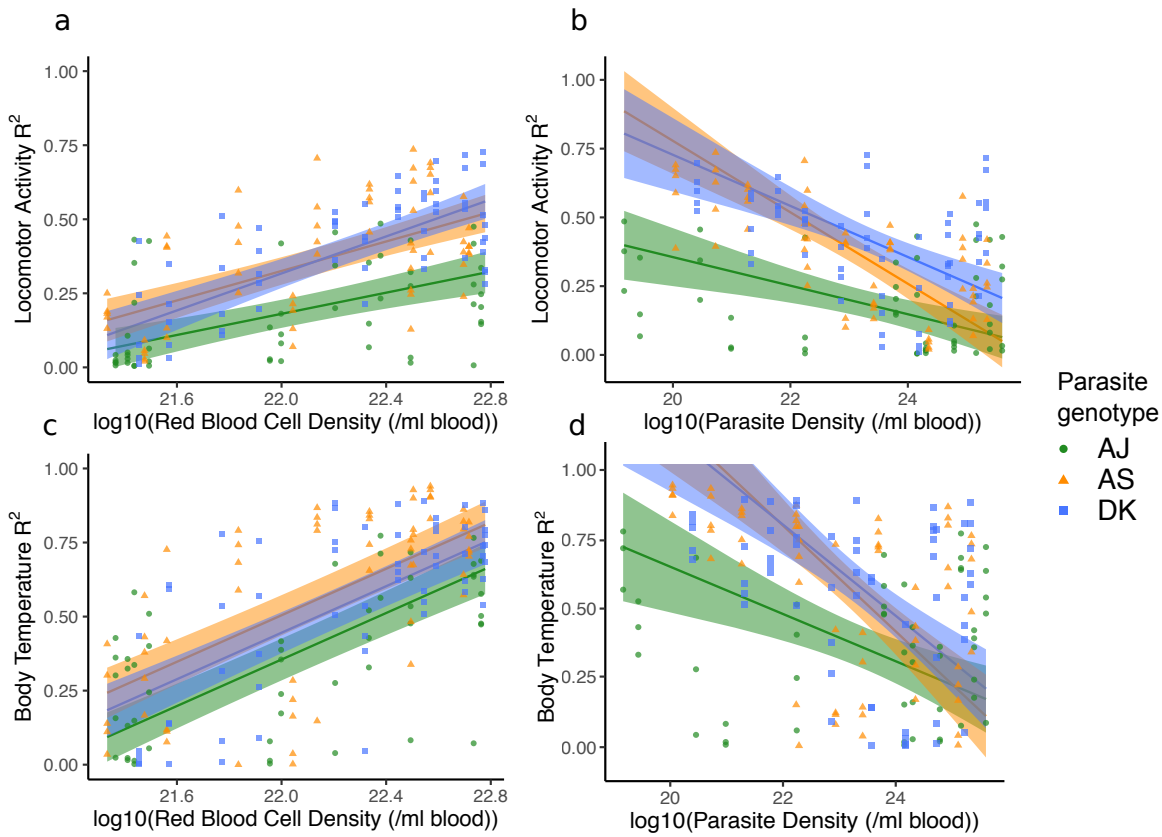

13

14 Fig. 5. Correlations between red blood cell (RBC) density and parasite density with levels of disruption to  
 15 locomotor activity (a, b) and body temperature (c, d) rhythms. Hosts infected with each of our parasite  
 16 genotypes are plotted (green circles=AJ, orange triangles=AS, blue squares=DK), with one measure per  
 17 day for either red blood cell density or parasite density on the x-axis (calculated from mean of 3 “sampling  
 18 mice” each day post infection), against all  $R^2$  values on the y-axis, on each corresponding day post  
 19 infection (calculated from “rhythm mice”,  $\leq 5$  per parasite genotype). A low  $R^2$  value indicates the pattern of  
 20 host rhythms is different to the rhythm observed before hosts were infected. RBC and parasite density data  
 21 are transformed by  $\log_{10}$  in the models to improve residual homogeneity. Model predictions are plotted as  
 22 a solid line for the overall model fit (fitted model for the average subject), with 95% confidence intervals  
 23 calculated by bootstrapping  $N=500$ . Models and error are bounded at 1 on the y-axis, as  $R^2$  does not go  
 24 above 1.

### 25 **Acknowledgements**

26 We thank Petra Schneider, Luke McNally, Pedro Vale and Hannes Becher for advice and discussion. We  
 27 also thank David Schneider and another anonymous reviewer for their insightful comments.

### 28 **Authors' contributions**

29 KFP, AJOD and SER designed the study; KFP and DvdV performed the data analysis; NJS, SSCR and  
 30 SER provided project supervision and aided in interpretation of the data; KFP wrote the first manuscript  
 31 draft. All authors gave final approval for publication.

### 32 **Competing interests**

33 The author(s) declare no competing interests.

### 34 **Funding**

35 The work was supported by the Human Frontiers Science Program (RGP0046/2013: KFP, AJOD, NJS,  
36 SER), Wellcome (202769/Z/16/Z: KFP, AJOD, SER) and the Royal Society (UF110155; NF140517: SER).  
37 SSCR is funded by a Royal Society Newton International Fellowship (NF140517), a strategic award from  
38 the Wellcome Trust (No. 095831) for the Centre for Immunity, Infection and Evolution, and the National  
39 Institute of Allergy and Infectious Diseases, National Institutes of Health, Department of Health and Human  
40 Services, under Contract No. HHSN272201400029C (VectorBase Bioinformatics Resource Center).
